# Supplementary material for: Mapping research trends of retinal vein occlusion from 2009 to 2018: a bibliometric analysis
Source: PeerJ. 2019 Aug 29;7:e7603. doi: 10.7717/peerj.7603 (PMC6717655; doi:10.7717/peerj.7603)
Supplement: Supplemental Information 1 — The minimum number of citations of a cited reference was set as 20. Of the 32,606 cited references that involved in RVO research, 305 cited references meet the threshold. [file peerj-07-7603-s001.csv]

id	label	x	y	cluster	weight<Links>	weight<Total link strength>	weight<Citations>
14	*branch vein occl, 1984, am j ophthalmol, v98, p271	0.0538	-0.4898	2	248	1720	133
26	*centr vein occl s, 1997, arch ophthalmol-chic, v115, p486	0.2989	-0.5512	5	161	405	32
123	1995, ophthalmology, v102, p1425	-0.384	-0.5521	5	108	216	21
160	[anonymous], 1984, am j ophthalmol, v98, p271	0.0972	0.2522	4	257	1543	97
425	ach t, 2010, graef arch clin exp, v248, p155, doi 10.1007/s00417-009-1167-6	-0.2855	-0.1232	2	168	586	43
465	adamis ap, 1994, am j ophthalmol, v118, p445, doi 10.1016/s0002-9394(14)75794-0	-0.8788	0.0741	3	145	384	35
661	aiello lp, 1994, new engl j med, v331, p1480, doi 10.1056/nejm199412013312203	-0.5914	-0.0396	3	281	1855	151
662	aiello lp, 1995, arch ophthalmol-chic, v113, p1538, doi 10.1001/archopht.1995.01100120068012	-0.6023	-0.0418	3	137	337	38
1255	antonetti da, 1998, diabetes, v47, p1953, doi 10.2337/diabetes.47.12.1953	-0.5345	0.3647	6	112	279	22
1283	appiah ap, 1989, ann ophthalmol, v21, p153	1.4532	-0.0818	1	86	246	22
1358	arevalo jf, 2007, ophthalmology, v114, p743, doi 10.1016/j.ophtha.2006.12.028	-1.0539	-0.2521	3	121	280	28
1696	avery rl, 2006, ophthalmology, v113, p1695, doi 10.1016/j.ophtha.2006.05.064	-1.2634	-0.2519	3	110	358	36
1698	avery rl, 2006, ophthalmology, v113, p363, doi 10.1016/j.ophtha.2005.11.019	-1.3104	-0.2361	3	88	282	33
1700	avery rl, 2006, retina-j ret vit dis, v26, p352, doi 10.1097/00006982-200603000-00016	-1.3007	-0.1787	3	75	172	20
1721	avitabile t, 2005, am j ophthalmol, v140, p695, doi 10.1016/j.ajo.2005.05.021	-0.5572	-0.485	2	147	342	20
1824	badala f, 2008, curr opin ophthalmol, v19, p234, doi 10.1097/icu.0b013e3282fb7fb0	0.0501	-0.6316	2	160	375	20
1918	bakri sj, 2007, ophthalmology, v114, p855, doi 10.1016/j.ophtha.2007.01.017	-1.2333	-0.2521	3	102	259	34
2369	beer pm, 2003, ophthalmology, v110, p681, doi 10.1016/s0161-6420(02)01969-3	-0.6613	-0.1599	5	98	183	22
2672	bertelsen m, 2012, brit med j, v345, doi 10.1136/bmj.e7885	1.3435	0.0576	1	79	219	27
2724	bezatis a, 2013, acta ophthalmol, v91, pe340, doi 10.1111/aos.12020	0.0197	0.7839	6	143	392	27
2773	bhisitkul rb, 2013, ophthalmology, v120, p1057, doi 10.1016/j.ophtha.2012.11.011	0.1425	0.6107	4	144	391	26
3125	bolz m, 2009, ophthalmology, v116, p914, doi 10.1016/j.ophtha.2008.12.039	-0.2899	0.1776	2	94	204	29
3310	boyd sr, 2002, arch ophthalmol-chic, v120, p1644	-0.4799	-0.0225	3	230	904	68
3314	boyer d, 2010, ophthalmology, v117, p1860, doi 10.1016/j.ophtha.2010.02.022	-0.1789	0.5585	4	271	2781	211
3315	boyer d, 2012, ophthalmology, v119, p1024, doi 10.1016/j.ophtha.2012.01.042	-0.3746	0.6765	4	204	964	59
3323	boyer ds, 2011, retina-j ret vit dis, v31, p915, doi 10.1097/iae.0b013e318206d18c	-0.6296	0.7447	6	74	213	23
3326	boyer ds, 2014, ophthalmology, v121, p1904, doi 10.1016/j.ophtha.2014.04.024	-0.5498	0.7255	6	127	366	47
3604	brown dm, 2006, new engl j med, v355, p1432, doi 10.1056/nejmoa062655	-0.9904	0.2067	3	168	628	68
3613	brown dm, 2010, ophthalmology, v117, p1124	-0.4759	-0.3466	5	117	257	25
3619	brown dm, 2011, ophthalmology, v118, p1594, doi 10.1016/j.ophtha.2011.02.022	-0.1882	0.5002	4	257	2032	153
3620	brown dm, 2013, am j ophthalmol, v155, p429, doi 10.1016/j.ajo.2012.09.026	-0.192	0.8284	4	218	1291	84
3624	brown dm, 2014, retina-j ret vit dis, v34, p1728, doi 10.1097/iae.0000000000000191	0.0517	0.7267	4	94	224	20
3692	browning dj, 2007, ophthalmology, v114, p525, doi 10.1016/j.ophtha.2006.06.052	-0.4551	-0.0309	2	138	240	26
3922	byun yj, 2010, graef arch clin exp, v248, p963, doi 10.1007/s00417-010-1320-2	-0.0362	-0.6409	2	142	368	21
3954	cahill mt, 2003, am j ophthalmol, v136, p1136, doi 10.1016/s0002-9394(03)00571-3	1.5769	-0.1579	1	58	148	26
4087	campochiaro pa, 2008, mol ther, v16, p791, doi 10.1038/mt.2008.10	-0.2813	0.0755	6	272	1792	122
4088	campochiaro pa, 2009, ophthalmology, v116, p2158, doi 10.1016/j.ophtha.2009.04.038	-0.5856	0.2576	3	107	197	20
4093	campochiaro pa, 2010, ophthalmology, v117, p1102, doi 10.1016/j.ophtha.2010.02.021	-0.1901	0.3782	4	285	3032	233
4096	campochiaro pa, 2010, ophthalmology, v117, p2387, doi 10.1016/j.ophtha.2010.03.060	-0.222	-0.0138	2	160	489	30
4099	campochiaro pa, 2011, ophthalmology, v118, p2041, doi 10.1016/j.ophtha.2011.02.038	-0.1216	0.6532	4	264	2096	152
4102	campochiaro pa, 2012, ophthalmologica, v227, p30, doi 10.1159/000337157	0.0583	0.5746	4	141	287	24
4107	campochiaro pa, 2013, ophthalmology, v120, p795, doi 10.1016/j.ophtha.2012.09.032	0.1104	0.6818	4	198	789	64
4110	campochiaro pa, 2014, ophthalmology, v121, p1783, doi 10.1016/j.ophtha.2014.03.021	-0.2375	0.6096	4	101	187	20
4111	campochiaro pa, 2014, ophthalmology, v121, p209, doi 10.1016/j.ophtha.2013.08.038	0.0033	0.7652	4	193	868	65
4116	campochiaro pa, 2015, ophthalmology, v122, p538, doi 10.1016/j.ophtha.2014.08.031	-0.0749	0.7324	4	170	612	49
4190	capone a, 2014, retina-j ret vit dis, v34, p342, doi 10.1097/iae.0b013e318297f842	-0.0816	0.9251	6	130	483	41
4359	catier a, 2005, am j ophthalmol, v140, p200, doi 10.1016/j.ajo.2005.02.053	-0.3538	-0.3047	2	97	179	23
4396	cekic o, 2005, retina-j ret vit dis, v25, p846, doi 10.1097/00006982-200510000-00005	-0.2901	-0.7093	5	114	245	21
4397	cekic o, 2005, retina-j ret vit dis, v25, p851	-0.1586	-0.7241	2	179	671	50
4640	chang-lin je, 2011, invest ophth vis sci, v52, p80, doi 10.1167/iovs.10-5285	-0.4342	0.8595	6	113	452	55
4838	chen sdm, 2006, am j ophthalmol, v141, p876, doi 10.1016/j.ajo.2005.12.011	-0.2527	-0.6024	2	171	545	39
4974	cheung n, 2008, invest ophth vis sci, v49, p4297, doi 10.1167/iovs.08-1826	1.3692	-0.071	1	154	657	52
5209	christoffersen nlb, 1999, ophthalmology, v106, p2054, doi 10.1016/s0161-6420(99)90483-9	0.5363	-0.0814	1	198	502	30
5267	chung ej, 2008, graef arch clin exp, v246, p1241, doi 10.1007/s00417-008-0866-8	-0.2409	-0.3904	2	187	794	50
5383	clark wl, 2016, ophthalmology, v123, p330, doi 10.1016/j.ophtha.2015.09.035	0.15	0.793	4	132	360	28
5396	clarkson jc, 1997, arch ophthalmol-chic, v115, p486	0.307	-0.1033	5	274	1896	153
5399	clarkson jg, 1993, arch ophthalmol-chic, v111, p1087	0.2965	-0.1747	5	217	676	49
5402	clarkson jg, 1995, ophthalmology, v102, p1425	0.0713	-0.0245	5	259	1702	114
5403	clarkson jg, 1995, ophthalmology, v102, p1434	0.3047	0.0482	5	217	842	60
5685	coscas f, 2016, am j ophthalmol, v161, p160, doi 10.1016/j.ajo.2015.10.008	0.5534	0.8022	4	79	223	33
5706	coscas g, 2011, ophthalmologica, v226, p4, doi 10.1159/000327391	0.2293	0.5553	4	176	479	38
5709	coscas g, 2014, eur j ophthalmol, v24, p1, doi 10.5301/ejo.5000376	-0.2254	0.9644	6	89	226	20
5730	costa ra, 2007, retina-j ret vit dis, v27, p141, doi 10.1097/iae.0b013e31802eff83	-0.5164	-0.5051	3	223	914	58
5877	cugati s, 2006, arch ophthalmol-chic, v124, p726, doi 10.1001/archopht.124.5.726	0.6422	0.031	1	243	926	68
5881	cugati s, 2007, ophthalmology, v114, p520, doi 10.1016/j.ophtha.2006.06.061	1.2915	-0.1458	1	163	498	44
6202	david r, 1988, ophthalmologica, v197, p69, doi 10.1159/000309923	1.041	-0.16	1	188	557	49
6646	deramo va, 2003, arch ophthalmol-chic, v121, p1297, doi 10.1001/archopht.121.9.1297	0.5409	0.4511	1	154	382	27
7362	early treatment diabetic retinopathy study res grp, 1991, ophthalmology, v98, p766	-0.7154	0.0681	3	91	143	21
7443	ehlers jp, 2011, surv ophthalmol, v56, p281, doi 10.1016/j.survophthal.2010.11.006	0.5285	0.2937	1	193	553	54
7610	elman mj, 1990, ophthalmology, v97, p1543	1.2597	-0.1142	1	133	345	25
7612	elman mj, 2010, ophthalmology, v117, p1064, doi 10.1016/j.ophtha.2010.02.031	-0.814	0.4351	3	145	390	38
7724	epstein dl, 2012, ophthalmology, v119, p2587, doi 10.1016/j.ophtha.2012.06.037	-0.0291	0.7007	4	200	772	42
7725	epstein dlj, 2012, ophthalmology, v119, p1184, doi 10.1016/j.ophtha.2012.01.022	-0.1648	0.5505	4	180	636	34
8257	ferrara dc, 2007, am j ophthalmol, v144, p864, doi 10.1016/j.ajo.2007.07.038	-0.4	-0.4585	5	218	854	54
8278	ferrara n, 2006, retina-j ret vit dis, v26, p859, doi 10.1097/01.iae.0000242842.14624.e7	-0.6468	0.3351	3	171	476	36
8348	figueroa ms, 2010, brit j ophthalmol, v94, p1052, doi 10.1136/bjo.2009.173732	0.0483	-0.2693	2	179	588	31
8403	finkelstein d, 1992, arch ophthalmol-chic, v110, p1427, doi 10.1001/archopht.1992.01080220089028	0.255	-0.207	2	199	592	44
8544	fong aco, 1993, surv ophthalmol, v37, p393, doi 10.1016/0039-6257(93)90138-w	0.8233	-0.1841	1	165	370	26
8733	frangieh gt, 1982, arch ophthalmol-chic, v100, p1132	0.5751	-0.1105	1	193	555	44
9015	funatsu h, 2003, ophthalmology, v110, p1690, doi 10.1016/s0161-6420(03)00568-2	-0.3885	-0.0038	3	134	204	20
9022	funatsu h, 2009, ophthalmology, v116, p73, doi 10.1016/j.ophtha.2008.09.037	-0.6885	0.2432	3	87	187	21
9027	fung ae, 2006, brit j ophthalmol, v90, p1344, doi 10.1136/bjo.2006.099598	-1.1183	-0.2799	3	114	278	35
9028	fung ae, 2007, am j ophthalmol, v143, p566, doi 10.1016/j.ajo.2007.01.028	-1.012	0.2107	3	85	163	23
9040	funk m, 2009, invest ophth vis sci, v50, p1025, doi 10.1167/iovs.08-2510	-0.2877	-0.0871	2	233	944	78
9853	glacet-bernard a, 2000, brit j ophthalmol, v84, p609, doi 10.1136/bjo.84.6.609	0.3452	-0.7034	5	135	302	21
9870	glacetbernard a, 1996, ophthalmology, v103, p551, doi 10.1016/s0161-6420(96)30653-2	0.2906	-0.3663	2	193	719	57
10193	gragoudas es, 2004, new engl j med, v351, p2805, doi 10.1056/nejmoa042760	-0.9725	-0.0982	3	163	406	25
10262	green w r, 1981, retina, v1, p27	0.6799	-0.2221	1	154	316	31
10263	green w r, 1981, trans am ophthalmol soc, v79, p371	0.3998	-0.3184	5	200	603	55
10283	greenberg pb, 2002, brit j ophthalmol, v86, p247, doi 10.1136/bjo.86.2.247	-0.1965	-0.8248	5	130	392	32
10306	gregori nz, 2006, retina-j ret vit dis, v26, p889, doi 10.1097/01.iae.0000237111.82357.30	-0.285	-0.7651	5	152	359	24
10309	gregori nz, 2009, retina-j ret vit dis, v29, p913, doi 10.1097/iae.0b013e3181aa8dfe	-0.515	-0.6063	2	133	369	23
10663	gutman fa, 1974, t am acad ophthalmol, v78, po178	0.168	-0.6156	2	147	342	20
10834	haller ja, 2010, arch ophthalmol-chic, v128, p289, doi 10.1001/archophthalmol.2010.21	-0.7229	0.6626	6	74	186	21
10838	haller ja, 2010, ophthalmology, v117, p1134, doi 10.1016/j.ophtha.2010.03.032	-0.0693	0.5109	6	274	2634	214
10840	haller ja, 2011, ophthalmology, v118, p2453, doi 10.1016/j.ophtha.2011.05.014	-0.2091	0.7771	6	247	1946	175
11053	hardarson sh, 2006, invest ophth vis sci, v47, p5011, doi 10.1167/iovs.06-0039	0.5541	0.097	1	63	136	26
11056	hardarson sh, 2010, am j ophthalmol, v150, p871, doi 10.1016/j.ajo.2010.06.020	0.6009	0.1561	1	75	147	23
11109	haritoglou c, 2006, retina-j ret vit dis, v26, p999, doi 10.1097/01.iae.0000247165.38655.bf	-1.0211	-0.2838	3	101	258	30
11355	hayreh sohan singh, 1994, indian journal of ophthalmology, v42, p109	0.5201	-0.2855	1	171	331	21
11396	hayreh ss, 1983, ophthalmology, v90, p458	0.4069	-0.3635	5	198	697	52
11397	hayreh ss, 1983, ophthalmology, v90, p488	0.5654	-0.1843	1	215	692	50
11406	hayreh ss, 1990, graef arch clin exp, v228, p201, doi 10.1007/bf00920022	0.4376	-0.1153	1	140	369	32
11411	hayreh ss, 1994, am j ophthalmol, v117, p429, doi 10.1016/s0002-9394(14)70001-7	0.7033	-0.0464	1	238	1067	80
11434	hayreh ss, 2001, am j ophthalmol, v131, p61, doi 10.1016/s0002-9394(00)00709-1	1.2288	-0.1244	1	180	817	77
11451	hayreh ss, 2004, ophthalmology, v111, p133, doi 10.1016/j.ophtha.2003.03.002	0.8127	-0.0517	1	156	330	35
11454	hayreh ss, 2005, prog retin eye res, v24, p493, doi 10.1016/j.preteyeres.2004.12.001	0.7313	-0.0926	1	238	1125	99
11469	hayreh ss, 2008, retina-j ret vit dis, v28, p581, doi 10.1097/iae.0b013e31815ec29b	0.8921	-0.1348	1	48	85	22
11482	hayreh ss, 2011, ophthalmology, v118, p119, doi 10.1016/j.ophtha.2010.04.019	0.5669	0.2226	1	195	669	54
11490	hayreh ss, 2014, prog retin eye res, v41, p1, doi 10.1016/j.preteyeres.2014.04.001	0.507	0.5026	4	113	224	31
11608	heier js, 2012, ophthalmology, v119, p2537, doi 10.1016/j.ophtha.2012.09.006	-0.7906	0.612	3	106	297	35
11609	heier js, 2012, ophthalmology, v119, p802, doi 10.1016/j.ophtha.2011.12.005	-0.0207	0.6498	4	240	1652	115
11613	heier js, 2014, ophthalmology, v121, p1414, doi 10.1016/j.ophtha.2014.01.027	-0.3614	0.9466	4	140	548	46
12057	hoeh ae, 2009, graef arch clin exp, v247, p1635, doi 10.1007/s00417-009-1151-1	-0.218	-0.5208	2	181	577	37
12058	hoeh ae, 2010, graef arch clin exp, v248, p1567, doi 10.1007/s00417-010-1419-5	-0.1133	-0.2152	2	124	283	21
12122	holash j, 2002, p natl acad sci usa, v99, p11393, doi 10.1073/pnas.172398299	-0.7856	0.5015	3	113	276	22
12199	holz fg, 2013, brit j ophthalmol, v97, p278, doi 10.1136/bjophthalmol-2012-301504	-0.3691	0.7313	4	190	828	49
12391	hsu j, 2007, retina-j ret vit dis, v27, p1013, doi 10.1097/iae.0b013e318050ca7c	-0.6983	-0.6548	5	137	475	33
12596	hurwitz h, 2004, new engl j med, v350, p2335, doi 10.1056/nejmoa032691	-1.2493	-0.2641	3	80	196	24
12797	iliev me, 2006, am j ophthalmol, v142, p1054, doi 10.1016/j.ajo.2006.06.066	-0.9654	-0.2924	3	140	303	29
12913	ip ms, 2004, arch ophthalmol-chic, v122, p1131, doi 10.1001/archopht.122.8.1131	-0.2938	-0.7459	5	128	370	35
12916	ip ms, 2009, arch ophthalmol-chic, v127, p1101, doi 10.1001/archophthalmol.2009.234	-0.1198	0.2328	5	275	2157	165
12958	ishibazawa a, 2015, am j ophthalmol, v160, p35, doi 10.1016/j.ajo.2015.04.021	0.4878	0.8378	4	41	82	21
13050	iturralde d, 2006, retina-j ret vit dis, v26, p279, doi 10.1097/00006982-200603000-00005	-0.5709	-0.425	3	256	1716	125
13219	jaissle gb, 2006, ophthalmologe, v103, p471, doi 10.1007/s00347-006-1355-2	-0.2124	-0.6034	2	182	513	28
13222	jaissle gb, 2009, graef arch clin exp, v247, p27, doi 10.1007/s00417-008-0916-2	-0.4806	-0.7431	2	186	862	55
13224	jaissle gb, 2011, graef arch clin exp, v249, p183, doi 10.1007/s00417-010-1470-2	-0.2344	0.125	2	148	477	39
13291	janssen mch, 2005, thromb haemostasis, v93, p1021, doi 10.1160/th04-11-0768	1.4044	-0.1324	1	157	627	60
13311	jaulim a, 2013, retina-j ret vit dis, v33, p901, doi 10.1097/iae.0b013e3182870c15	0.5853	0.4893	4	175	522	50
13408	jia yl, 2012, opt express, v20, p4710, doi 10.1364/oe.20.004710	0.4971	0.7819	4	65	165	27
13411	jia yl, 2015, p natl acad sci usa, v112, pe2395, doi 10.1073/pnas.1500185112	0.5015	0.8534	4	47	109	20
13569	jonas j, 2010, dev ophthalmol, v47, p111, doi 10.1159/000320076	0.5011	0.334	4	174	387	27
13607	jonas jb, 2002, graef arch clin exp, v240, p782, doi 10.1007/s00417-002-0529-0	-0.2479	-0.6644	5	161	390	29
13642	jonas jb, 2005, eye, v19, p65, doi 10.1038/sj.eye.6701395	-0.188	-0.6303	2	177	593	42
13644	jonas jb, 2005, ophthalmology, v112, p593, doi 10.1016/j.ophtha.2004.10.042	-0.4728	-0.2772	5	99	181	26
13765	joshi l, 2013, brit j ophthalmol, v97, p1040, doi 10.1136/bjophthalmol-2013-303207	-0.1427	0.6916	6	134	336	23
13784	joussen am, 2004, faseb j, v18, p1450, doi 10.1096/fj.03-1476fje	-0.6842	0.1516	3	69	103	20
14015	kaneda s, 2011, invest ophth vis sci, v52, p2982, doi 10.1167/iovs.10-6299	-0.045	0.1584	6	137	336	27
14034	kang hm, 2013, graef arch clin exp, v251, p501, doi 10.1007/s00417-012-2067-8	-0.1763	0.05	2	134	309	21
14119	karacorlu m, 2005, retina-j ret vit dis, v25, p856, doi 10.1097/00006982-200510000-00007	-0.0691	-0.6361	2	115	299	20
14159	karia n, 2010, clin ophthalmol, v4, p809	0.6418	0.3377	1	137	242	23
14295	kaur c, 2008, prog retin eye res, v27, p622, doi 10.1016/j.preteyeres.2008.09.003	-0.1613	-0.0144	3	136	224	22
14880	kinge b, 2010, am j ophthalmol, v150, p310, doi 10.1016/j.ajo.2010.03.028	0.1155	0.5586	4	162	516	32
15075	klein r, 2000, t am ophthal soc, v98, p141	0.6134	0.0056	1	199	556	35
15077	klein r, 2000, trans am ophthalmol soc, v98, p133	0.7946	0.0038	1	264	2005	157
15096	klein r, 2008, arch ophthalmol-chic, v126, p513, doi 10.1001/archopht.126.4.513	0.7243	0.0817	1	252	1363	110
15310	koizumi h, 2007, am j ophthalmol, v144, p858, doi 10.1016/j.ajo.2007.07.036	1.3249	-0.1975	1	114	335	31
15338	kolar p, 2014, j ophthalmol, doi 10.1155/2014/724780	0.9783	0.1804	1	110	213	28
15388	kondo m, 2009, retina-j ret vit dis, v29, p1242, doi 10.1097/iae.0b013e3181aa8e20	-0.1423	-0.5768	2	168	639	42
15465	korobelnik jf, 2014, ophthalmology, v121, p202, doi 10.1016/j.ophtha.2013.08.012	-0.0867	0.8717	4	180	758	51
15498	koss mj, 2012, acta ophthalmol, v90, pe98, doi 10.1111/j.1755-3768.2011.02292.x	-0.2477	0.2772	3	157	383	36
15649	kreutzer tc, 2008, brit j ophthalmol, v92, p351, doi 10.1136/bjo.2007.123513	-0.4258	-0.7133	2	203	816	50
15653	kriechbaum k, 2008, brit j ophthalmol, v92, p518, doi 10.1136/bjo.2007.127282	-0.4591	-0.6129	2	236	1408	84
15690	krohne tu, 2008, am j ophthalmol, v146, p508, doi 10.1016/j.ajo.2008.05.036	-0.9516	-0.2748	3	140	335	32
15759	kuhli c, 2002, graef arch clin exp, v240, p163, doi 10.1007/s00417-001-0415-1	1.3321	-0.2976	1	106	203	20
15766	kuhli-hattenbach c, 2010, thromb haemostasis, v103, p299, doi 10.1160/th09-05-0331	1.2915	-0.2489	1	135	331	25
15805	kumagai k, 2007, retina-j ret vit dis, v27, p49, doi 10.1097/01.iae.0000221996.77421.69	0.2312	-0.5913	2	175	490	30
15831	kumar b, 1998, ophthalmology, v105, p424, doi 10.1016/s0161-6420(98)93022-6	0.572	0.0521	1	142	296	21
15899	kuppermann bd, 2007, arch ophthalmol-chic, v125, p309, doi 10.1001/archopht.125.3.309	-0.3972	0.4453	6	191	660	57
16098	lahey jm, 2002, ophthalmology, v109, p126, doi 10.1016/s0161-6420(01)00842-9	1.3749	-0.2136	1	113	258	23
16319	laouri m, 2011, eye, v25, p981, doi 10.1038/eye.2011.92	0.7939	0.3905	1	143	383	35
16350	larsen m, 2016, ophthalmology, v123, p1101, doi 10.1016/j.ophtha.2016.01.011	-0.1397	0.9152	4	108	295	25
17162	lim ll, 2008, brit j ophthalmol, v92, p1316, doi 10.1136/bjo.2008.140640	1.3714	-0.0804	1	128	502	42
17413	liu ww, 2007, ophthalmology, v114, p1795, doi 10.1016/j.ophtha.2007.03.010	1.3163	-0.1363	1	75	222	23
17634	lowder c, 2011, arch ophthalmol-chic, v129, p545, doi 10.1001/archophthalmol.2010.339	-0.4875	0.8193	6	78	235	35
18162	mandelcorn ms, 2004, retina-j ret vit dis, v24, p348, doi 10.1097/00006982-200406000-00002	0.1805	-0.7105	2	183	552	38
18243	manzano rpa, 2006, retina-j ret vit dis, v26, p257, doi 10.1097/00006982-200603000-00001	-1.1993	-0.3678	3	78	204	21
18262	marcucci r, 2001, thromb haemostasis, v86, p772	1.6426	-0.1758	1	57	254	39
18335	marmor mf, 1999, doc ophthalmol, v97, p239, doi 10.1023/a:1002192829817	-0.2005	-0.0699	2	96	189	23
18380	martidis a, 2002, ophthalmology, v109, p920, doi 10.1016/s0161-6420(02)00975-2	-0.6689	-0.3274	5	135	301	44
18385	martin df, 2011, new engl j med, v364, p1897, doi 10.1056/nejmoa1102673	-0.7973	0.3752	3	149	392	41
18386	martin df, 2012, ophthalmology, v119, doi 10.1016/j.ophtha.2012.03.053	-0.965	0.4267	3	110	337	39
18400	martin sc, 2002, brit j ophthalmol, v86, p774, doi 10.1136/bjo.86.7.774	1.5508	-0.1099	1	70	191	20
18626	matsumoto y, 2007, retina-j ret vit dis, v27, p426, doi 10.1097/iae.0b013e31804a7af2	-0.1038	-0.4914	2	208	798	43
18724	mayer wj, 2013, eye, v27, p816, doi 10.1038/eye.2013.79	-0.245	0.7735	6	121	293	23
18757	mcallister il, 2009, am j ophthalmol, v147, p838, doi 10.1016/j.ajo.2008.12.006	0.0121	0.0425	5	157	376	30
18762	mcallister il, 2012, clin exp ophthalmol, v40, p48, doi 10.1111/j.1442-9071.2011.02713.x	0.2772	0.1475	1	145	269	21
18853	mcgimpsey sj, 2009, ophthalmology, v116, p1778, doi 10.1016/j.ophtha.2009.02.033	1.4686	-0.0854	1	70	152	22
18871	mcintosh rl, 2007, ophthalmology, v114, p835, doi 10.1016/j.ophtha.2007.01.010	0.4872	-0.3984	2	228	958	59
19233	michels rg, 1974, t am acad ophthalmol, v78, po166	0.5491	-0.4553	2	172	414	21
19236	michels s, 2005, ophthalmology, v112, p1035, doi 10.1016/j.ophtha.2005.02.007	-1.2371	-0.1161	3	97	261	23
19485	mitchell p, 1996, arch ophthalmol-chic, v114, p1243, doi 10.1001/archopht.1996.01100140443012	0.7317	-0.1556	1	261	1812	139
19504	mitchell p, 2011, ophthalmology, v118, p615, doi 10.1016/j.ophtha.2011.01.031	-0.8543	0.4609	3	116	267	31
19629	mohamed q, 2007, ophthalmology, v114, p507, doi 10.1016/j.ophtha.2006.11.011	0.5938	-0.3715	5	193	646	51
19659	moisseiev e, 2013, eye, v27, p65, doi 10.1038/eye.2012.226	-0.1045	0.7653	6	141	366	26
20166	murakami t, 2007, am j ophthalmol, v143, p171, doi 10.1016/j.ajo.2006.08.030	-0.2827	-0.2601	2	142	453	41
20190	muraoka y, 2013, ophthalmology, v120, p91, doi 10.1016/j.ophtha.2012.06.054	0.6397	0.2116	1	75	127	20
20528	nauck m, 1998, eur j pharmacol, v341, p309, doi 10.1016/s0014-2999(97)01464-7	-0.2071	0.0908	6	136	345	24
20697	nguyen qd, 2006, am j ophthalmol, v142, p961, doi 10.1016/j.ajo.2006.06.068	-0.8891	0.1786	3	126	277	26
20707	nguyen qd, 2012, ophthalmology, v119, p789, doi 10.1016/j.ophtha.2011.12.039	-0.8248	0.5675	3	91	307	37
20821	nishijima k, 2007, am j pathol, v171, p53, doi 10.2353/ajpath.2007.061237	-0.641	0.0268	3	147	260	27
20899	noma h, 2005, am j ophthalmol, v140, p256, doi 10.1016/j.ajo.2005.03.003	-0.3091	-0.3241	2	250	1590	130
20900	noma h, 2006, graef arch clin exp, v244, p309, doi 10.1007/s00417-004-1087-4	-0.2931	-0.3101	2	251	1304	100
20902	noma h, 2008, eye, v22, p42, doi 10.1038/sj.eye.6702498	-0.3359	-0.2151	2	230	1161	97
20907	noma h, 2009, ophthalmology, v116, p87, doi 10.1016/j.ophtha.2008.09.034	-0.1918	0.1287	3	219	785	68
20910	noma h, 2010, eur j ophthalmol, v20, p402	-0.282	-0.0181	3	110	238	23
20947	noma h, 2013, jama ophthalmol, v131, p160, doi 10.1001/2013.jamaophthalmol.228	-0.0979	0.4602	4	126	251	26
20951	noma h, 2014, invest ophth vis sci, v55, p3878, doi 10.1167/iovs.14-13961	-0.351	0.5135	4	98	171	21
21115	o'mahoney pra, 2008, arch ophthalmol-chic, v126, p692, doi 10.1001/archopht.126.5.692	1.168	-0.1047	1	185	642	49
21193	ogino k, 2012, retina-j ret vit dis, v32, p77, doi 10.1097/iae.0b013e318217ffc7	-0.205	0.2043	2	83	147	23
21212	ogura y, 2014, am j ophthalmol, v158, p1032, doi 10.1016/j.ajo.2014.07.027	-0.342	0.9086	4	108	276	23
21244	ohashi h, 2004, ophthalmology, v111, p2050, doi 10.1016/j.ophtha.2004.04.031	-0.0872	-0.4572	2	117	285	22
21496	opremcak em, 1999, retina-j ret vit dis, v19, p1	0.1952	-0.3448	2	191	556	34
21497	opremcak em, 2001, retina-j ret vit dis, v21, p408, doi 10.1097/00006982-200110000-00002	0.2596	-0.6485	5	180	559	46
21498	opremcak em, 2006, retina-j ret vit dis, v26, p297, doi 10.1097/00006982-200603000-00008	0.5116	-0.5149	5	145	307	21
21540	orth dh, 1978, surv ophthalmol, v22, p357, doi 10.1016/0039-6257(78)90132-7	0.6043	-0.3314	1	143	292	21
21560	osborne nn, 2004, prog retin eye res, v23, p91, doi 10.1016/j.preteyeres.2003.12.001	-0.4179	0.017	3	32	47	23
21601	ota m, 2007, brit j ophthalmol, v91, p1644, doi 10.1136/bjo.2007.118497	-0.205	-0.1134	2	195	618	55
21602	ota m, 2008, am j ophthalmol, v145, p273, doi 10.1016/j.ajo.2007.09.019	-0.1617	-0.32	2	154	571	54
21603	ota m, 2008, retina-j ret vit dis, v28, p1502, doi 10.1097/iae.0b013e3181840b3c	-0.0715	-0.1596	2	179	492	46
21614	otani t, 1999, am j ophthalmol, v127, p688, doi 10.1016/s0002-9394(99)00033-1	-0.5225	-0.1623	2	105	191	27
21615	otani t, 2000, am j ophthalmol, v129, p487, doi 10.1016/s0002-9394(99)00409-2	-0.1378	-0.5429	2	62	261	21
21761	pai sa, 2007, am j ophthalmol, v143, p601, doi 10.1016/j.ajo.2006.12.037	-0.4791	-0.6004	2	213	1056	67
21878	papadopoulos n, 2012, angiogenesis, v15, p171, doi 10.1007/s10456-011-9249-6	-0.6451	0.777	3	101	296	27
21951	park ch, 2003, am j ophthalmol, v136, p419, doi 10.1016/s0002-9394(03)00228-9	-0.2351	-0.8123	5	105	283	25
22016	park sp, 2010, retina-j ret vit dis, v30, p281, doi 10.1097/iae.0b013e3181b9f153	-0.1978	-0.3428	2	100	191	20
22062	parodi mb, 1995, int ophthalmol, v19, p25, doi 10.1007/bf00156415	0.4421	0.3743	4	121	219	25
22068	parodi mb, 1999, graef arch clin exp, v237, p1024	0.1639	-0.7302	2	171	552	28
22078	parodi mb, 2009, ophthalmologica, v223, p298, doi 10.1159/000213640	0.5421	-0.0019	1	160	315	20
22228	patz a, 1985, arch ophthalmol-chic, v103, p1796, doi 10.1001/archopht.1985.01050120030015	-0.7627	0.2066	3	145	350	45
22285	pe'er j, 1998, ophthalmology, v105, p412, doi 10.1016/s0161-6420(98)93020-2	-0.4702	-0.2856	5	242	1013	83
22330	peer j, 1995, lab invest, v72, p638	-0.7205	-0.2458	3	114	236	21
22607	pielen a, 2013, plos one, v8, doi 10.1371/journal.pone.0078538	-0.1464	0.9651	4	121	372	31
22614	pieramici dante j, 2008, ophthalmology, v115, pe47, doi 10.1016/j.ophtha.2008.06.021	-0.091	-0.4157	5	168	479	28
22883	pournaras cj, 1990, ophthalmology, v97, p1321	0.2454	0.1318	1	94	158	21
22889	pournaras cj, 2008, prog retin eye res, v27, p284, doi 10.1016/j.preteyeres.2008.02.002	0.3431	0.1021	1	88	154	25
22919	prager f, 2009, brit j ophthalmol, v93, p452, doi 10.1136/bjo.2008.141085	-0.4072	-0.4793	2	242	1272	83
22944	prasad ps, 2010, ophthalmology, v117, p780, doi 10.1016/j.ophtha.2009.09.019	0.2057	0.308	4	109	177	22
22997	priglinger sg, 2007, retina-j ret vit dis, v27, p1004, doi 10.1097/iae.0b013e3180ed458d	-0.5164	-0.5432	5	205	763	48
23174	querques l, 2013, ophthalmologica, v229, p21, doi 10.1159/000342160	-0.1872	0.9589	6	125	442	38
23204	quinlan pm, 1990, am j ophthalmol, v110, p118, doi 10.1016/s0002-9394(14)76979-x	0.5179	-0.5788	5	159	394	28
23240	rabena md, 2007, retina-j ret vit dis, v27, p419, doi 10.1097/iae.0b013e318030e77e	-0.4331	-0.5574	2	248	1542	96
23460	rath ez, 1992, ophthalmology, v99, p509	1.0729	-0.0783	1	156	424	34
23578	regillo cd, 2008, am j ophthalmol, v145, p239, doi 10.1016/j.ajo.2007.10.004	-1.0273	0.0754	3	120	263	20
23589	rehak j, 2008, curr eye res, v33, p111, doi 10.1080/02713680701851902	0.4011	0.1207	1	257	1583	146
23594	rehak m, 2008, thromb haemostasis, v99, p925, doi 10.1160/th07-11-0658	1.5734	-0.1516	1	67	239	29
23596	rehak m, 2009, invest ophth vis sci, v50, p2359, doi 10.1167/iovs.08-2332	-0.2002	-0.018	3	122	224	29
23599	rehak m, 2010, j thromb haemost, v8, p1886, doi 10.1111/j.1538-7836.2010.03909.x	0.6969	0.3512	1	174	486	48
24105	rogers s, 2010, ophthalmology, v117, p313, doi [10.1016/j.ophtha.2009.07.017 10.1016/j.ophtha.2010.01.060]	0.501	0.3193	1	291	3122	266
24112	rogers sl, 2010, ophthalmology, v117, p1094, doi 10.1016/j.ophtha.2010.01.058	0.4468	0.1967	1	264	1511	119
24252	rosenberg n, 1986, arch ophthalmol-chic, v104, p34	0.3423	-0.1201	1	210	740	53
24269	rosenfeld pj, 2005, ophthal surg las im, v36, p331, doi 10.3928/1542-8877-20050701-14	-1.0171	-0.2013	3	168	513	42
24270	rosenfeld pj, 2005, ophthal surg las im, v36, p336, doi 10.3928/1542-8877-20050701-15	-0.667	-0.389	3	248	1223	84
24274	rosenfeld pj, 2006, new engl j med, v355, p1419, doi 10.1056/nejmoa054481	-0.9841	0.1224	3	199	902	99
24552	russo v, 2009, retina-j ret vit dis, v29, p511, doi 10.1097/iae.0b013e318195ca65	-0.116	-0.1622	2	196	753	40
24642	sacu s, 2011, invest ophth vis sci, v52, p3046, doi 10.1167/iovs.10-5842	0.0177	0.2876	1	102	150	21
24701	saika s, 2001, graef arch clin exp, v239, p729, doi 10.1007/s004170100344	0.2685	-0.5269	2	145	348	26
25604	scott iu, 2007, ophthalmology, v114, p1860, doi 10.1016/j.ophtha.2007.05.062	-1.0702	-0.1513	3	110	236	28
25610	scott iu, 2009, arch ophthalmol-chic, v127, p1115, doi 10.1001/archophthalmol.2009.233	-0.0741	0.0267	2	275	2409	174
25612	scott iu, 2009, ophthalmology, v116, p504, doi 10.1016/j.ophtha.2008.10.017	0.2271	-0.2548	2	213	649	43
25616	scott iu, 2011, ophthalmology, v118, p345, doi 10.1016/j.ophtha.2010.06.034	-0.0326	0.3858	4	153	369	27
25946	shahar j, 2006, retina-j ret vit dis, v26, p262, doi 10.1097/00006982-200603000-00002	-1.1772	-0.3324	3	92	200	20
25947	shahid h, 2006, brit j ophthalmol, v90, p627, doi 10.1136/bjo.2005.068668	0.6503	-0.131	1	116	199	20
26360	shroff daraius, 2008, international ophthalmology, v28, p261, doi 10.1007/s10792-007-9123-0	0.1796	-0.3586	2	159	344	21
26791	smith leh, 1994, invest ophth vis sci, v35, p101	-0.6302	0.198	3	71	119	21
26823	smithen lm, 2004, am j ophthalmol, v138, p740, doi 10.1016/j.ajo.2004.06.067	-0.4227	-0.4061	5	107	201	23
27015	sophie r, 2013, am j ophthalmol, v156, p693, doi 10.1016/j.ajo.2013.05.039	-0.0335	0.7181	4	159	475	34
27084	spaide rf, 2003, retina-j ret vit dis, v23, p343, doi 10.1097/00006982-200306000-00009	-0.0037	-0.2995	2	148	471	39
27093	spaide rf, 2006, retina-j ret vit dis, v26, p275, doi 10.1097/00006982-200603000-00004	-1.3684	-0.2975	3	63	223	24
27094	spaide rf, 2006, retina-j ret vit dis, v26, p383, doi 10.1097/00006982-200604000-00001	-1.2889	-0.2884	3	87	278	28
27099	spaide rf, 2009, am j ophthalmol, v147, p298, doi 10.1016/j.ajo.2008.08.016	-0.2998	-0.2329	5	234	1014	66
27112	spaide rf, 2015, jama ophthalmol, v133, p45, doi 10.1001/jamaophthalmol.2014.3616	0.5589	0.7764	4	92	259	45
27116	spaide rf, 2015, retina-j ret vit dis, v35, p2163, doi 10.1097/iae.0000000000000765	0.464	0.8335	4	29	80	20
27156	sperduto rd, 1998, ophthalmology, v105, p765, doi 10.1016/s0161-6420(98)95012-6	1.1972	-0.0296	1	123	345	34
27247	stahl a, 2007, graef arch clin exp, v245, p1429, doi 10.1007/s00417-007-0569-6	-0.3177	-0.6773	5	193	863	52
27357	stefansson e, 1990, invest ophth vis sci, v31, p284	0.3129	-0.3335	1	179	496	39
27361	stefansson e, 2001, acta ophthalmol scan, v79, p435, doi 10.1034/j.1600-0420.2001.790502.x	0.081	-0.4161	1	112	203	22
27367	stefansson e, 2009, graef arch clin exp, v247, p147, doi 10.1007/s00417-008-0980-7	0.1503	-0.1195	1	80	136	20
27844	suzuki n, 2016, am j ophthalmol, v161, p126, doi 10.1016/j.ajo.2015.09.038	0.5318	0.8156	4	80	203	20
27949	tachi n, 1999, doc ophthalmol, v97, p465, doi 10.1023/a:1002432032354	0.1306	-0.5668	2	154	478	36
28257	tao y, 2010, eye, v24, p810, doi 10.1038/eye.2009.220	0.0296	-0.3745	5	169	353	21
28453	thach ab, 2014, ophthalmology, v121, p1059, doi 10.1016/j.ophtha.2013.11.022	-0.0174	0.8898	4	116	298	26
28492	the central vein occlusion study group, 1993, arch ophthalmol-chic, v111, p1087	0.4994	-0.5259	5	146	320	22
28724	tolentino mj, 1996, ophthalmology, v103, p1820, doi 10.1016/s0161-6420(96)30420-x	-0.4593	0.0329	3	183	544	41
28936	tripathi rc, 1998, ophthalmology, v105, p232, doi 10.1016/s0161-6420(98)92782-8	-1.2786	-0.2485	3	54	134	21
28993	tsaloumas md, 2000, eye, v14, p821, doi 10.1038/eye.2000.230	1.5425	-0.1738	1	81	279	29
29029	tso mom, 1982, ophthalmology, v89, p902	-0.142	-0.2105	2	128	279	26
29043	tsui i, 2011, retina-j ret vit dis, v31, p105, doi 10.1097/iae.0b013e3181e36c6d	0.2021	0.3926	4	81	151	21
29060	tsujikawa a, 2010, am j ophthalmol, v149, p291, doi 10.1016/j.ajo.2009.09.007	-0.0375	-0.1545	2	149	486	44
29565	varma r, 2012, ophthalmology, v119, p2108, doi 10.1016/j.ophtha.2012.05.017	0.0726	0.4606	4	174	494	36
29991	wakabayashi t, 2008, ophthalmology, v115, p1571, doi 10.1016/j.ophtha.2008.02.026	-1.2435	-0.184	3	69	135	21
30458	weinberg d, 1990, am j ophthalmol, v109, p298, doi 10.1016/s0002-9394(14)74554-4	0.5534	-0.0304	1	149	326	25
30506	weiss jn, 2001, ophthalmology, v108, p2249, doi 10.1016/s0161-6420(01)00875-2	0.3594	-0.6972	5	161	455	34
30542	wells ja, 2015, new engl j med, v372, p1193, doi 10.1056/nejmoa1414264	-0.6323	0.5863	3	90	180	25
30801	williamson th, 2005, am j ophthalmol, v139, p860, doi 10.1016/j.ajo.2005.01.001	-0.3096	-0.7994	5	116	319	24
30803	williamson th, 2009, graef arch clin exp, v247, p1019, doi 10.1007/s00417-009-1072-z	0.3827	-0.1887	1	122	220	20
31068	wong ty, 2005, ophthalmology, v112, p540, doi 10.1016/j.ophtha.2004.10.039	1.409	-0.0855	1	122	599	74
31079	wong ty, 2010, new engl j med, v363, p2135, doi 10.1056/nejmcp1003934	0.5943	0.2758	1	210	707	65
31159	wroblewski jj, 2009, arch ophthalmol-chic, v127, p374, doi 10.1001/archophthalmol.2009.14	0.1962	-0.1516	5	202	700	31
31187	wu l, 2008, graef arch clin exp, v246, p81, doi 10.1007/s00417-007-0660-z	-1.0644	-0.2069	3	133	294	31
31188	wu l, 2009, retina-j ret vit dis, v29, p1396, doi 10.1097/iae.0b013e3181bcef53	-0.1502	-0.6	2	165	412	22
31197	wu lt, 2008, retina-j ret vit dis, v28, p212, doi 10.1097/iae.0b013e3181619bee	-0.4618	-0.6328	2	203	814	46
31433	yamaguchi y, 2006, retina-j ret vit dis, v26, p1029, doi 10.1097/01.iae.0000254893.94013.16	0.0684	-0.3472	2	115	251	20
31435	yamaike n, 2008, ophthalmology, v115, p355, doi 10.1016/j.ophtha.2007.04.052	-0.2402	-0.2088	2	151	453	45
31437	yamaike n, 2009, retina-j ret vit dis, v29, p757, doi 10.1097/iae.0b013e31819d4fbf	-0.2107	-0.4692	2	95	244	20
31460	yamamoto s, 2004, am j ophthalmol, v138, p907, doi 10.1016/j.ajo.2004.06.061	0.2838	-0.3905	2	168	357	21
31627	yannuzzi la, 1993, am j ophthalmol, v116, p286	1.0967	-0.2259	1	158	481	45
31628	yannuzzi la, 1996, arch ophthalmol-chic, v114, p545	1.1686	-0.2825	1	128	356	40
31681	yasuda m, 2010, invest ophth vis sci, v51, p3205, doi 10.1167/iovs.09-4453	1.3339	-0.0358	1	106	259	22
31696	yau jwy, 2008, intern med j, v38, p904, doi 10.1111/j.1445-5994.2008.01720.x	0.7268	0.2654	1	196	630	48
31698	yau jwy, 2012, diabetes care, v35, p556, doi 10.2337/dc11-1909	-0.3825	0.4088	3	83	127	20
31732	yeh ws, 2012, ophthalmology, v119, p1190, doi 10.1016/j.ophtha.2011.12.028	-0.3023	0.7576	6	167	528	38
31898	yoshimura t, 2009, plos one, v4, doi 10.1371/journal.pone.0008158	-0.0962	0.2034	6	170	422	34
32355	zhao jl, 1993, ophthalmology, v100, p423	0.6784	0.0504	1	189	528	41
32428	zhou jq, 2013, ophthalmology, v120, p803, doi 10.1016/j.ophtha.2012.09.033	1.0305	0.2666	1	117	289	27
